# Supplementary material for: Electrostatic attraction driven and shuttle-like morphology assisted enhancement for tumor uptake
Source: Royal Society of Chemistry journal article supplement (doi:10.1039/c7ra10970a), 2017-01-01
Supplement: c7ra10970a1.pdf [file c7ra10970a1.pdf]

## Supporting Information:

### Electrostatic Attraction Driven and Shuttle-Like Morphology Assisted Enhancement for Tumor Uptake

*Min Lin,<sup>a,d,†</sup> Shuwei Liu,<sup>a,†</sup> Dandan Wang,<sup>b</sup> Shuyao Li,<sup>a</sup> Xue Zhang,<sup>a</sup> Rui Ge,<sup>a</sup> Xing Li,<sup>b</sup> Yi Liu,<sup>a</sup> Wenzhi Song,<sup>c,\*</sup> Hongchen Sun,<sup>a,b,\*</sup> Hao Zhang,<sup>a,\*</sup> and Bai Yang<sup>a</sup>*

<sup>a</sup> State Key Laboratory of Supramolecular Structure and Materials, College of Chemistry, Jilin University, Changchun 130012, P. R. China. E-mail: hao\_zhang@jlu.edu.cn.

<sup>b</sup> Department of Oral Pathology, School and Hospital of Stomatology, Jilin University, Changchun 130021, P. R. China. E-mail: hcsun@jlu.edu.cn.

<sup>c</sup> Department of Stomatology, China-Japan Union Hospital, Jilin University, Changchun 130031, P. R. China. E-mail: songwz@jlu.edu.cn.

<sup>d</sup> Collaborative Innovation Center for Marine Biomass Fibers, Materials and Textiles of Shandong Province, Institute of Marine Biobased Materials, School of Materials Science and Engineering, Qingdao University, Qingdao 266071, China.

<sup>†</sup> Min Lin and Shuwei Liu contribute equally to this paper. <sup>\*</sup>To whom correspondence should be addressed and H.Z. proposed and supervised the project. Fax: +86 431 85193423.

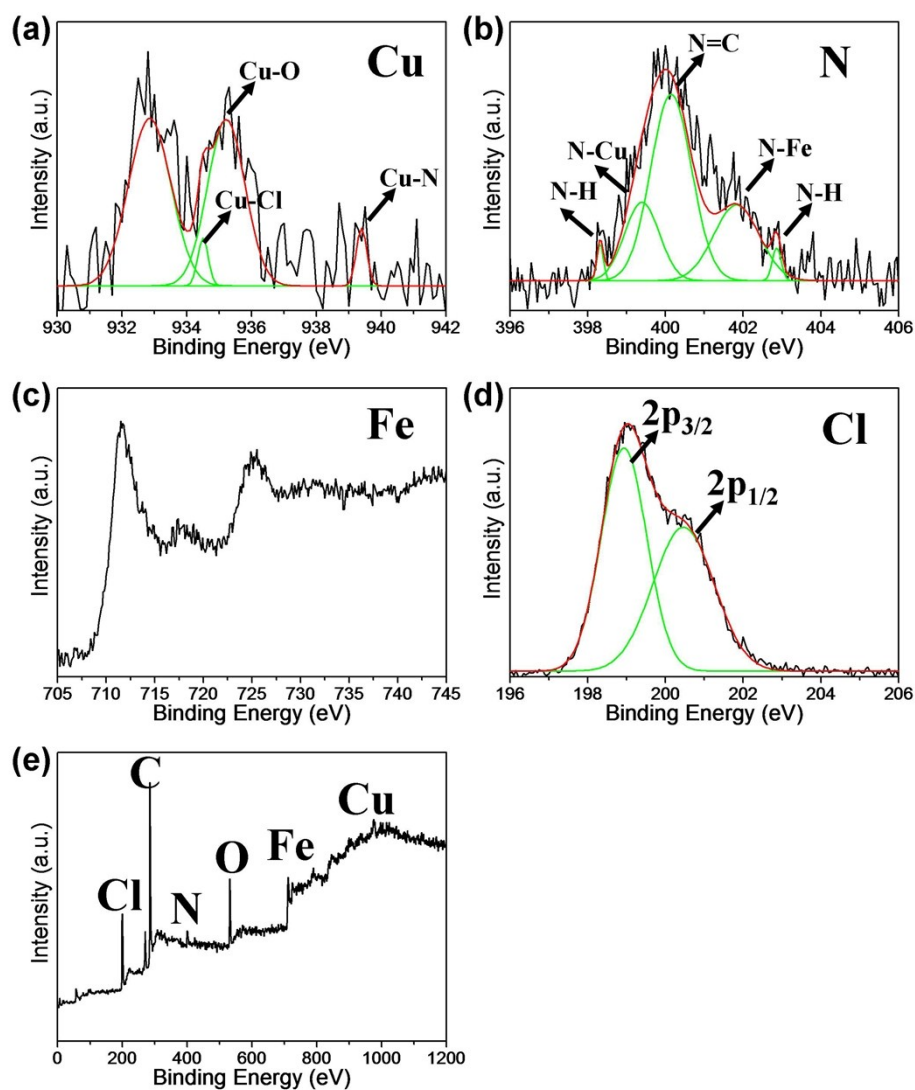

**Figure S1.** XPS of Cu2p<sub>3/2</sub> (a), N1s (b), Fe2p<sub>3/2</sub> (c), Cl2p (d) and total spectra (e) for CuPani NSs.

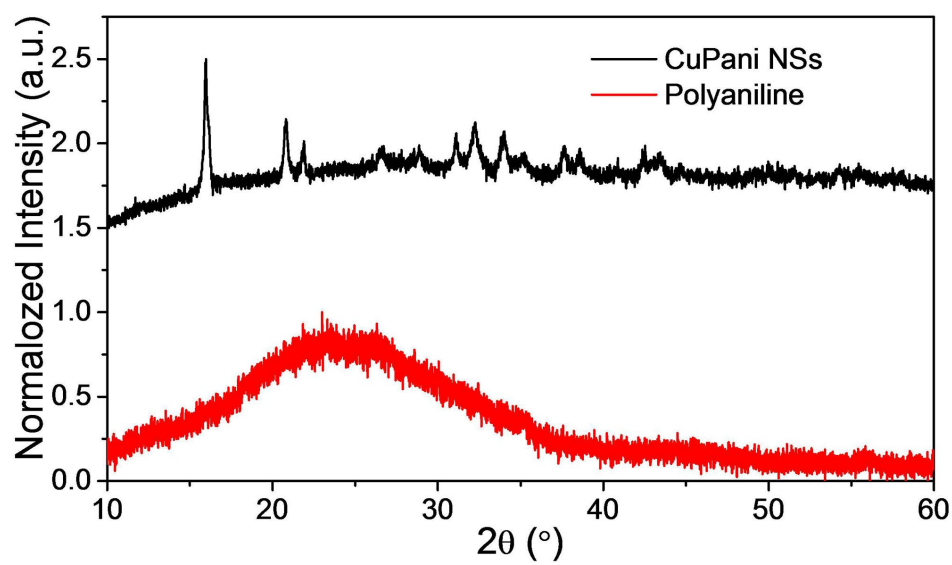

**Figure S2.** XRD patterns for CuPani NSs and polyaniline without doping of Cu(II).

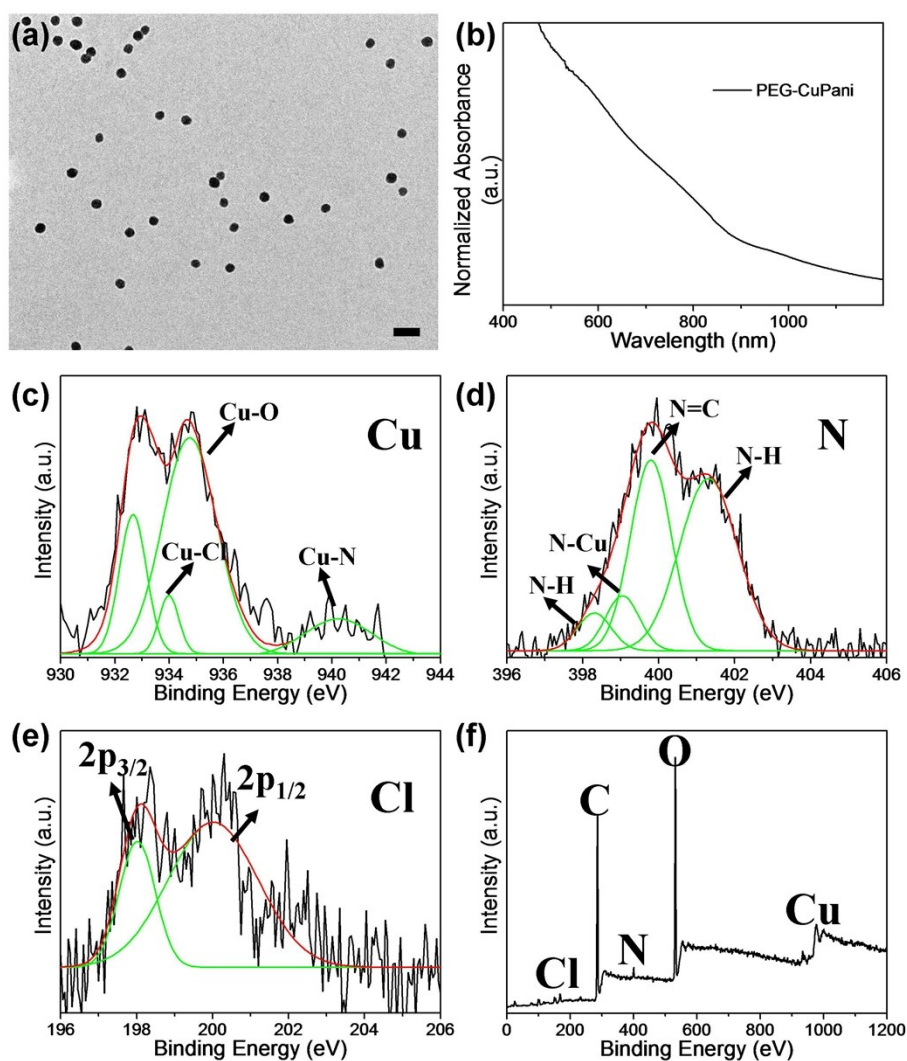

**Figure S3.** TEM image (a) and UV-vis-NIR absorption spectra (b) of PEG-CuPani NPs. The scale bar represents 200 nm. XPS Cu<sub>2</sub>p<sub>3/2</sub> (c), N<sub>1</sub>s (d), Cl<sub>2</sub>p (e) and total spectra (f) for PEG-CuPani NPs.

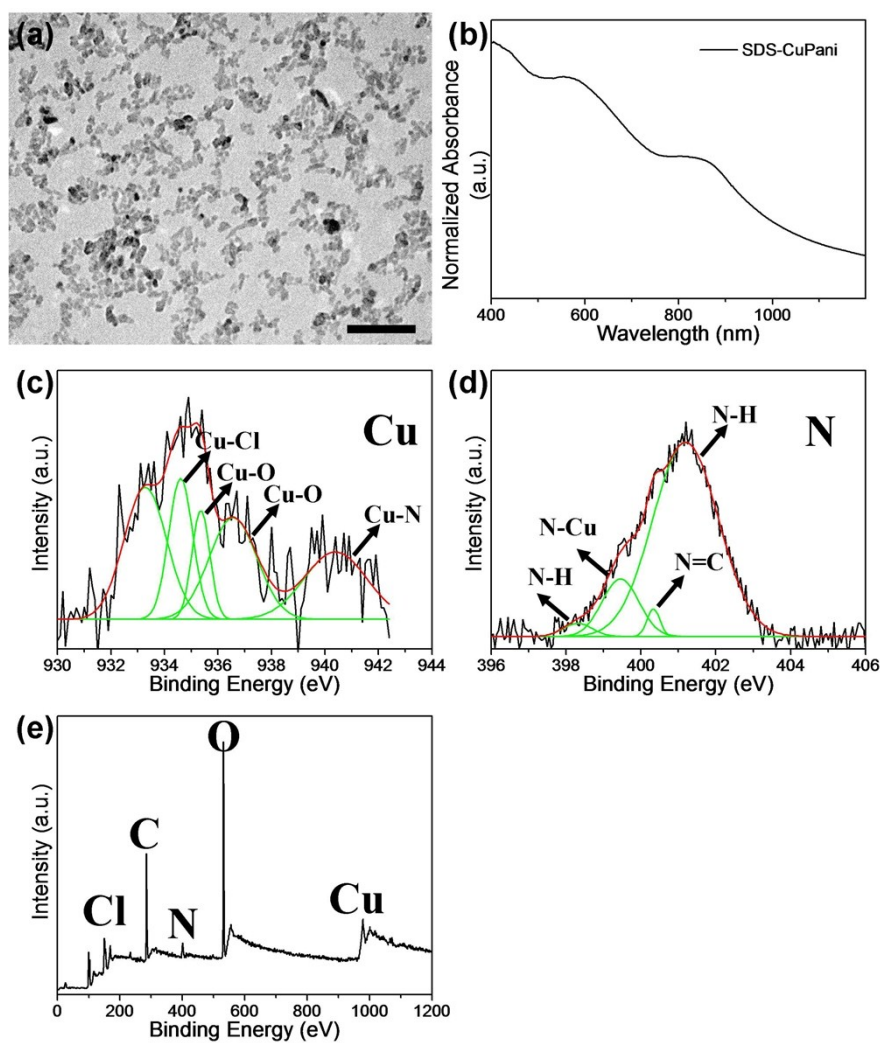

**Figure S4.** TEM image (a) and UV-vis-NIR absorption spectra (b) of SDS-CuPani NPs. The scale bar represents 200 nm. XPS  $\text{Cu}2p_{3/2}$  (c),  $\text{N}1s$  (d) and total spectra (e) for SDS-CuPani NPs.

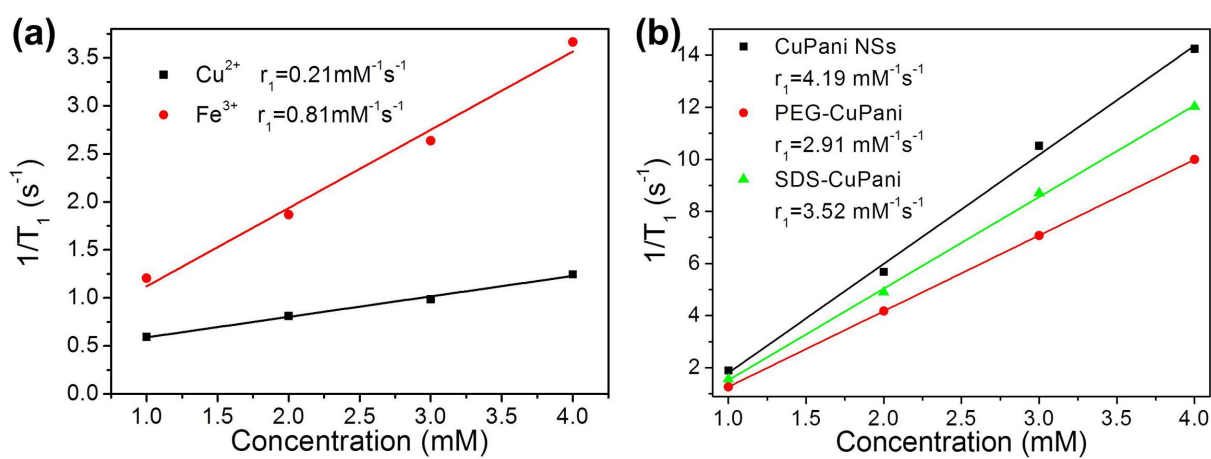

**Figure S5.** Concentration-dependent longitudinal relaxation  $T_1$  of Cu(II) and Fe(III) (a), and CuPani NSs, PEG-CuPani and SDS-CuPani NPs (b).  $T_1$  is tested by a 500 M NMR spectrum.

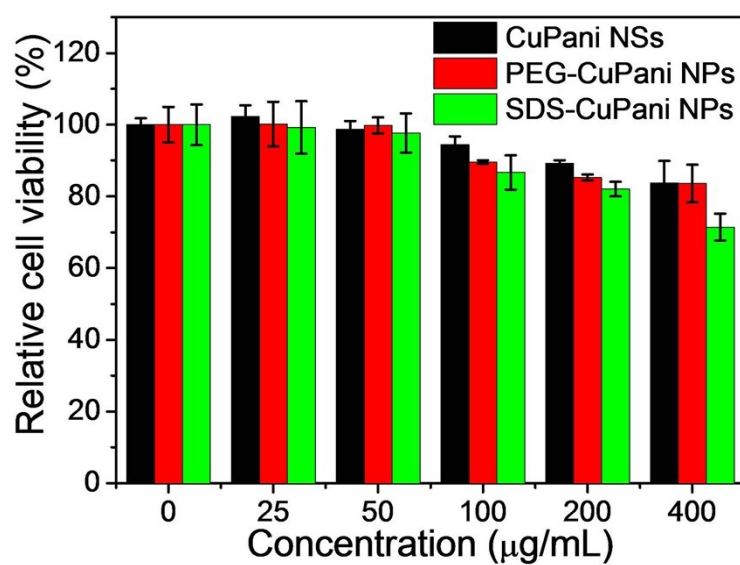

**Figure S6.** Cytotoxicity of KB cells for CuPani NSs, PEG- and SDS-CuPani NPs. The relative cell viability is determined by MTT assay after 24 h incubation with NSs and NPs at different concentration.

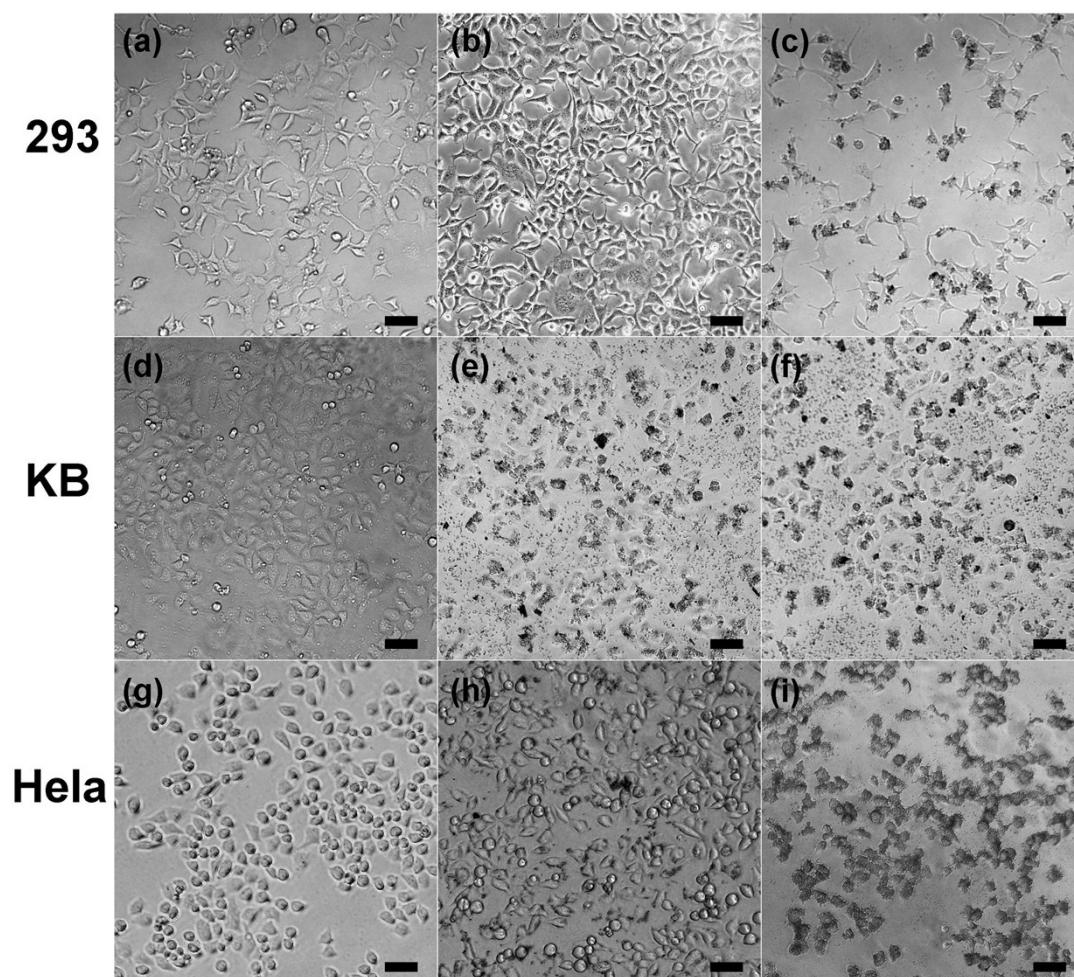

**Figure S7.** The nonspecific cellular adhesion/internalization of CuPani NSs. The photographs of NSs adhered/internalized to 293 (a-c), KB (d-f), and Hela (g-i) cells at the concentration of 0 (a, d, g), 25 (b, e, h), and 50  $\mu\text{g/mL}$  (c, f, i). The scale bar is 50  $\mu\text{m}$ .

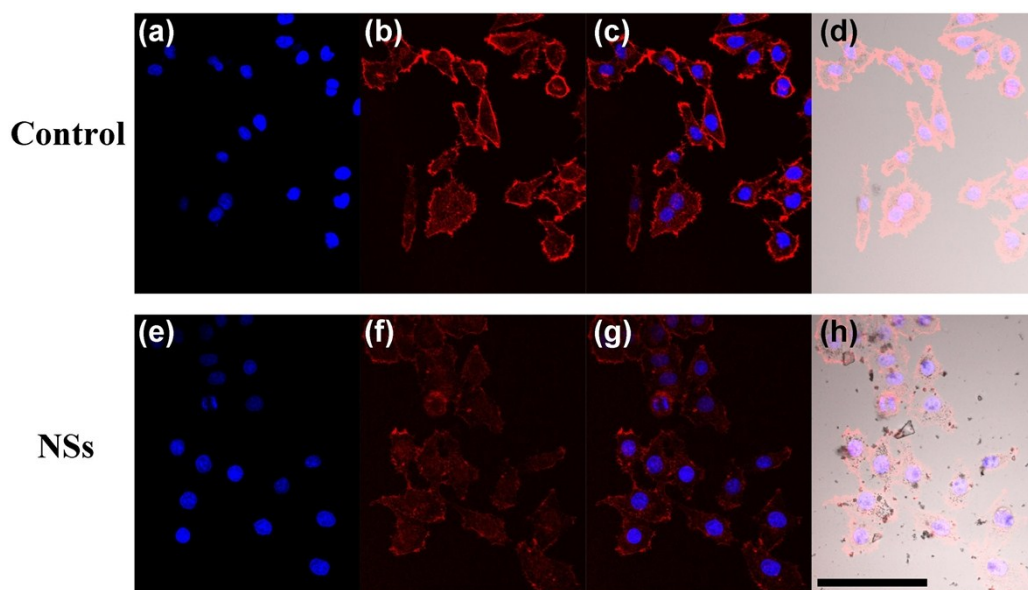

**Figure S8.** Fluorescent confocal images of HeLa cells before (a-d) and after (e-h) nonspecific cellular adhesion/internalization of CuPani NSs. Fluorescent images of the nucleuses (a, e), cytoskeletons (b, f), overlays in dark fields (c, g) and overlays in bright fields (d, h) of HeLa cells. The nucleuses and cytoskeletons are stained by phalloidin and 4',6-diamidino-2-phenylindole, separately. The scale bar is 50  $\mu\text{m}$ .

|                      | Zeta potential (mV) |
|----------------------|---------------------|
| 293                  | -18.1±0.7           |
| KB                   | -23.4±0.5           |
| Hela                 | -29.1±1.1           |
| CuPani NSs           | +33.0±0.1           |
| Neutral NSs          | -5.8±0.2            |
| Negative charged NSs | -20.5±0.2           |
| PEG-CuPani NPs       | -5.6±0.4            |
| SDS-CuPani NPs       | -20.1±0.3           |
| Pani NSs             | +26.3±0.1           |

**Table S1.** Zeta potentials for 293, KB, Hela cells, CuPani NSs, neutral NSs, negative charged NSs, Pani NSs, PEG-CuPani and SDS-CuPani NPs dispersed in saline.

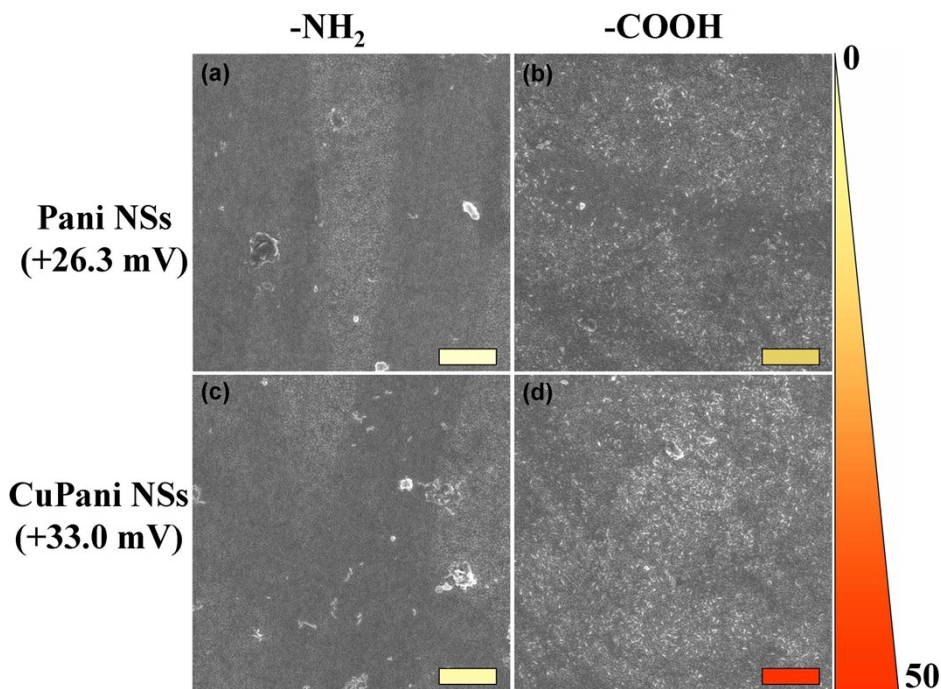

**Figure S9.** SEM images of Pani (a, b) and CuPani (c, d) NSs adhered on the gold substrates modified with  $-\text{NH}_2$  (a, c) and  $-\text{COOH}$  (b, d). The gold substrates are first immersed in the solution of 2-mercaptoethylamine and 3-mercaptopropionic acid separately and then vertically placed into the solution of 1 mg/mL CuPani and Pani NSs for 24 h. The scale bar is 1  $\mu\text{m}$  and the color of scale bar represents the relative quantity of adhered NSs on the basis of the reduced reflective rate. The reduced reflective rate of CuPani NPs adhered on  $-\text{NH}_2$ -modified substrates is set as “1”.
